# Supplementary material for: Seroprevalence of SARS-CoV-2 Antibodies in Africa: A Systematic Review and Meta-Analysis
Source: MDPI journal article supplement (doi:10.3390/ijerph19127257), 2022-06-14
Supplement: s1 [file s1]

# Seroprevalence of SARS-CoV-2 antibodies in Africa: A systematic review and meta-analysis

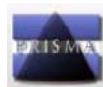

**Table S1: PRISMA 2020 Checklist**

| Section and Topic             | Item # | Checklist item                                                                                                                                                                                                                                                                                       | Location where item is reported |
|-------------------------------|--------|------------------------------------------------------------------------------------------------------------------------------------------------------------------------------------------------------------------------------------------------------------------------------------------------------|---------------------------------|
| <b>TITLE</b>                  |        |                                                                                                                                                                                                                                                                                                      |                                 |
| Title                         | 1      | Identify the report as a systematic review.                                                                                                                                                                                                                                                          | 1                               |
| <b>ABSTRACT</b>               |        |                                                                                                                                                                                                                                                                                                      |                                 |
| Abstract                      | 2      | See the PRISMA 2020 for Abstracts checklist.                                                                                                                                                                                                                                                         | 2                               |
| <b>INTRODUCTION</b>           |        |                                                                                                                                                                                                                                                                                                      |                                 |
| Rationale                     | 3      | Describe the rationale for the review in the context of existing knowledge.                                                                                                                                                                                                                          | 3-4                             |
| Objectives                    | 4      | Provide an explicit statement of the objective(s) or question(s) the review addresses.                                                                                                                                                                                                               | 5                               |
| <b>METHODS</b>                |        |                                                                                                                                                                                                                                                                                                      |                                 |
| Eligibility criteria          | 5      | Specify the inclusion and exclusion criteria for the review and how studies were grouped for the syntheses.                                                                                                                                                                                          | 5-6                             |
| Information sources           | 6      | Specify all databases, registers, websites, organisations, reference lists and other sources searched or consulted to identify studies. Specify the date when each source was last searched or consulted.                                                                                            | 5                               |
| Search strategy               | 7      | Present the full search strategies for all databases, registers and websites, including any filters and limits used.                                                                                                                                                                                 | Table S2                        |
| Selection process             | 8      | Specify the methods used to decide whether a study met the inclusion criteria of the review, including how many reviewers screened each record and each report retrieved, whether they worked independently, and if applicable, details of automation tools used in the process.                     | 5                               |
| Data collection process       | 9      | Specify the methods used to collect data from reports, including how many reviewers collected data from each report, whether they worked independently, any processes for obtaining or confirming data from study investigators, and if applicable, details of automation tools used in the process. | 6-7                             |
| Data items                    | 10a    | List and define all outcomes for which data were sought. Specify whether all results that were compatible with each outcome domain in each study were sought (e.g. for all measures, time points, analyses), and if not, the methods used to decide which results to collect.                        | 6-7                             |
|                               | 10b    | List and define all other variables for which data were sought (e.g. participant and intervention characteristics, funding sources). Describe any assumptions made about any missing or unclear information.                                                                                         | 6-7                             |
| Study risk of bias assessment | 11     | Specify the methods used to assess risk of bias in the included studies, including details of the tool(s) used, how many reviewers assessed each study and whether they worked independently, and if applicable, details of automation tools used in the process.                                    | 6                               |
| Effect measures               | 12     | Specify for each outcome the effect measure(s) (e.g. risk ratio, mean difference) used in the synthesis or presentation of results.                                                                                                                                                                  | 7                               |
| Synthesis methods             | 13a    | Describe the processes used to decide which studies were eligible for each synthesis (e.g. tabulating the study intervention characteristics and comparing against the planned groups for each synthesis (item #5)).                                                                                 | 7                               |
|                               | 13b    | Describe any methods required to prepare the data for presentation or synthesis, such as handling of missing summary statistics, or data conversions.                                                                                                                                                | 7                               |
|                               | 13c    | Describe any methods used to tabulate or visually display results of individual studies and syntheses.                                                                                                                                                                                               | 7                               |
|                               | 13d    | Describe any methods used to synthesize results and provide a rationale for the choice(s). If meta-analysis was performed, describe the model(s), method(s) to identify the presence and extent of statistical heterogeneity, and software package(s) used.                                          | 7                               |
|                               | 13e    | Describe any methods used to explore possible causes of heterogeneity among study results (e.g. subgroup analysis, meta-regression).                                                                                                                                                                 | 7                               |

| Section and Topic                              | Item # | Checklist item                                                                                                                                                                                                                                                                       | Location where item is reported |
|------------------------------------------------|--------|--------------------------------------------------------------------------------------------------------------------------------------------------------------------------------------------------------------------------------------------------------------------------------------|---------------------------------|
|                                                | 13f    | Describe any sensitivity analyses conducted to assess robustness of the synthesized results.                                                                                                                                                                                         |                                 |
| Reporting bias assessment                      | 14     | Describe any methods used to assess risk of bias due to missing results in a synthesis (arising from reporting biases).                                                                                                                                                              | 7                               |
| Certainty assessment                           | 15     | Describe any methods used to assess certainty (or confidence) in the body of evidence for an outcome.                                                                                                                                                                                | NA                              |
| <b>RESULTS</b>                                 |        |                                                                                                                                                                                                                                                                                      |                                 |
| Study selection                                | 16a    | Describe the results of the search and selection process, from the number of records identified in the search to the number of studies included in the review, ideally using a flow diagram.                                                                                         | 7-8                             |
|                                                | 16b    | Cite studies that might appear to meet the inclusion criteria, but which were excluded, and explain why they were excluded.                                                                                                                                                          | NA                              |
| Study characteristics                          | 17     | Cite each included study and present its characteristics.                                                                                                                                                                                                                            | 10-11                           |
| Risk of bias in studies                        | 18     | Present assessments of risk of bias for each included study.                                                                                                                                                                                                                         | Table S3                        |
| Results of individual studies                  | 19     | For all outcomes, present, for each study: (a) summary statistics for each group (where appropriate) and (b) an effect estimate and its precision (e.g. confidence/credible interval), ideally using structured tables or plots.                                                     | 12, 14-16                       |
| Results of syntheses                           | 20a    | For each synthesis, briefly summarise the characteristics and risk of bias among contributing studies.                                                                                                                                                                               | NA                              |
|                                                | 20b    | Present results of all statistical syntheses conducted. If meta-analysis was done, present for each the summary estimate and its precision (e.g. confidence/credible interval) and measures of statistical heterogeneity. If comparing groups, describe the direction of the effect. | 12, 14-16                       |
|                                                | 20c    | Present results of all investigations of possible causes of heterogeneity among study results.                                                                                                                                                                                       | 15-16                           |
|                                                | 20d    | Present results of all sensitivity analyses conducted to assess the robustness of the synthesized results.                                                                                                                                                                           | 19                              |
| Reporting biases                               | 21     | Present assessments of risk of bias due to missing results (arising from reporting biases) for each synthesis assessed.                                                                                                                                                              | NA                              |
| Certainty of evidence                          | 22     | Present assessments of certainty (or confidence) in the body of evidence for each outcome assessed.                                                                                                                                                                                  | NA                              |
| <b>DISCUSSION</b>                              |        |                                                                                                                                                                                                                                                                                      |                                 |
| Discussion                                     | 23a    | Provide a general interpretation of the results in the context of other evidence.                                                                                                                                                                                                    | 19-21                           |
|                                                | 23b    | Discuss any limitations of the evidence included in the review.                                                                                                                                                                                                                      | 21                              |
|                                                | 23c    | Discuss any limitations of the review processes used.                                                                                                                                                                                                                                | NA                              |
|                                                | 23d    | Discuss implications of the results for practice, policy, and future research.                                                                                                                                                                                                       | 32                              |
| <b>OTHER INFORMATION</b>                       |        |                                                                                                                                                                                                                                                                                      |                                 |
| Registration and protocol                      | 24a    | Provide registration information for the review, including register name and registration number, or state that the review was not registered.                                                                                                                                       | 5                               |
|                                                | 24b    | Indicate where the review protocol can be accessed, or state that a protocol was not prepared.                                                                                                                                                                                       | 5                               |
|                                                | 24c    | Describe and explain any amendments to information provided at registration or in the protocol.                                                                                                                                                                                      | NA                              |
| Support                                        | 25     | Describe sources of financial or non-financial support for the review, and the role of the funders or sponsors in the review.                                                                                                                                                        | NA                              |
| Competing interests                            | 26     | Declare any competing interests of review authors.                                                                                                                                                                                                                                   | 29                              |
| Availability of data, code and other materials | 27     | Report which of the following are publicly available and where they can be found: template data collection forms; data extracted from included studies; data used for all analyses; analytic code; any other materials used in the review.                                           | 30                              |

From: Page MJ, McKenzie JE, Bossuyt PM, Boutron I, Hoffmann TC, Mulrow CD, et al. The PRISMA 2020 statement: an updated guideline for reporting systematic reviews. *BMJ* 2021;372:n71. doi: 10.1136/bmj.n71

For more information, visit: <http://www.prisma-statement.org/>

**Table S2: Detailed Search Strategy**

| Databases     | Search Strategy                                                                                                                                                                                                                                                                                                                                                                                                                                                                                                                                                                                                                                                                                                                                                                                                                                                                                                                                                                                                                                                                                                                                                                                                                                                                                                                                                                                                                                                                                                                                                                                                                                                                                                                                                                                                                                                                                                                                                                                                                                                                                                                                                                                                                                                                                                                                                                                                            |
|---------------|----------------------------------------------------------------------------------------------------------------------------------------------------------------------------------------------------------------------------------------------------------------------------------------------------------------------------------------------------------------------------------------------------------------------------------------------------------------------------------------------------------------------------------------------------------------------------------------------------------------------------------------------------------------------------------------------------------------------------------------------------------------------------------------------------------------------------------------------------------------------------------------------------------------------------------------------------------------------------------------------------------------------------------------------------------------------------------------------------------------------------------------------------------------------------------------------------------------------------------------------------------------------------------------------------------------------------------------------------------------------------------------------------------------------------------------------------------------------------------------------------------------------------------------------------------------------------------------------------------------------------------------------------------------------------------------------------------------------------------------------------------------------------------------------------------------------------------------------------------------------------------------------------------------------------------------------------------------------------------------------------------------------------------------------------------------------------------------------------------------------------------------------------------------------------------------------------------------------------------------------------------------------------------------------------------------------------------------------------------------------------------------------------------------------------|
| <b>PubMed</b> | ((((((((((((Prevalence[Title/Abstract])) OR (Seroprevalence[Title/Abstract])) OR (Seroepidemiology[Title/Abstract])) OR (Proportion[Title/Abstract])) OR (Serosurvey[Title/Abstract])) OR (surveillance[Title/Abstract])) OR (Anti[Title/Abstract])) OR (Antibody[Title/Abstract])) OR (antibodies[Title/Abstract])) OR (IgG[Title/Abstract])) OR (IgM[Title/Abstract])) OR (IgA[Title/Abstract])) AND (((((((SARS[Title/Abstract]) OR (SARS-CoV-2[Title/Abstract])) OR (SARS-CoV2[Title/Abstract])) OR (COVID-19[Title/Abstract])) OR (COVID19[Title/Abstract])) OR (coronavirus[Title/Abstract])) OR (nCoV[Title/Abstract])) AND (((((((((((((((((((((((((((((((Algeria[Title/Abstract]) OR (Egypt[Title/Abstract])) OR (Libya[Title/Abstract])) OR (Morocco[Title/Abstract])) OR ("South Sudan"[Title/Abstract])) OR (Sudan[Title/Abstract])) OR (Tunisia[Title/Abstract])) OR (Burundi[Title/Abstract])) OR (Comoros[Title/Abstract])) OR (Djibouti[Title/Abstract])) OR (Eritrea[Title/Abstract])) OR (Ethiopia[Title/Abstract])) OR (Kenya[Title/Abstract])) OR (Madagascar[Title/Abstract])) OR (Malawi[Title/Abstract])) OR (Mauritius[Title/Abstract])) OR (Mozambique[Title/Abstract])) OR (Rwanda[Title/Abstract])) OR (Seychelles[Title/Abstract])) OR (Somalia[Title/Abstract])) OR (Tanzania[Title/Abstract])) OR (Uganda[Title/Abstract])) OR (Zambia[Title/Abstract])) OR (Zimbabwe[Title/Abstract])) OR (Benin[Title/Abstract])) OR ("Burkina Faso"[Title/Abstract])) OR ("Cape Verde"[Title/Abstract])) OR ("Cote d'Ivoire"[Title/Abstract])) OR ("Ivory Coast"[Title/Abstract])) OR (Gambia[Title/Abstract])) OR (Ghana[Title/Abstract])) OR (Guinea[Title/Abstract])) OR (Guinea-Bissau[Title/Abstract])) OR (Liberia[Title/Abstract])) OR (Mali[Title/Abstract])) OR (Mauritania[Title/Abstract])) OR (Niger[Title/Abstract])) OR (Nigeria[Title/Abstract])) OR (Senegal[Title/Abstract])) OR ("Sierra Leone"[Title/Abstract])) OR (Togo[Title/Abstract])) OR (Angola[Title/Abstract])) OR (Cameroon[Title/Abstract])) OR ("Central African Republic"[Title/Abstract])) OR (Chad[Title/Abstract])) OR (Congo[Title/Abstract])) OR ("Equatorial Guinea"[Title/Abstract])) OR (Gabon[Title/Abstract])) OR ("Sao Tome"[Title/Abstract])) OR (Botswana[Title/Abstract])) OR (Lesotho[Title/Abstract])) OR (Namibia[Title/Abstract])) OR ("South Africa"[Title/Abstract])) OR (Swaziland[Title/Abstract])) |
| <b>Scopus</b> | TITLE-ABS ( prevalence OR seroprevalence OR "Seroepidemiology" OR proportion OR serosurvey OR surveillance OR anti OR antibody OR antibodies OR igg OR igm OR iga ) AND TITLE-ABS ( sars OR sars-cov-2 OR sars-cov2 OR covid-19 OR covid19 OR coronavirus OR nCoV ) AND TITLE-ABS ( Algeria OR Egypt OR Libya OR morocco OR "South Sudan" OR sudan OR Tunisia OR Burundi OR comoros OR Djibouti OR Eritrea OR Ethiopia OR Kenya OR Madagascar OR Malawi OR Mauritius OR Mozambique OR Rwanda OR Seychelles OR Somalia OR Tanzania OR Uganda OR Zambia OR Zimbabwe OR benin OR "Burkina Faso" OR "Cape Verde" OR "Cote d'Ivoire" OR "Ivory Coast" OR gambia OR Ghana OR guinea OR guinea-bissau OR Liberia OR mali OR Mauritania OR niger OR Nigeria OR Senegal OR "Sierra Leone" OR togo OR angola OR Cameroon OR "Central African Republic" OR chad OR congo OR "Equatorial Guinea" OR gabon OR "Sao Tome" OR Botswana OR Lesotho OR Namibia OR "South Africa" OR Swaziland)                                                                                                                                                                                                                                                                                                                                                                                                                                                                                                                                                                                                                                                                                                                                                                                                                                                                                                                                                                                                                                                                                                                                                                                                                                                                                                                                                                                                                                              |
| <b>Web of</b> | TI/AB=(SARS OR COVID OR coronavirus OR nCoV) AND TI/AB=(Prevalence OR Seroprevalence OR Seroepidemiology OR Surveillance OR anti OR Antibody OR antibodies OR IgG OR IgM OR IgA) AND                                                                                                                                                                                                                                                                                                                                                                                                                                                                                                                                                                                                                                                                                                                                                                                                                                                                                                                                                                                                                                                                                                                                                                                                                                                                                                                                                                                                                                                                                                                                                                                                                                                                                                                                                                                                                                                                                                                                                                                                                                                                                                                                                                                                                                       |

|                       |                                                                                                                                                                                                                                                                                                                                                                                                                                                                                                                                                                                                                                                                                                                                                                                                                                                            |
|-----------------------|------------------------------------------------------------------------------------------------------------------------------------------------------------------------------------------------------------------------------------------------------------------------------------------------------------------------------------------------------------------------------------------------------------------------------------------------------------------------------------------------------------------------------------------------------------------------------------------------------------------------------------------------------------------------------------------------------------------------------------------------------------------------------------------------------------------------------------------------------------|
| <b>Science</b>        | TI/AB=(Algeria OR Egypt OR Libya OR Morocco OR “South Sudan” OR Sudan OR Tunisia OR Burundi OR Comoros OR Djibouti OR Eritrea OR Ethiopia OR Kenya OR Madagascar OR Malawi OR Mauritius OR Mozambique OR Rwanda OR Seychelles OR Somalia OR Tanzania OR Uganda OR Zambia OR Zimbabwe OR Benin OR “Burkina Faso” OR “Cape Verde” OR “Cote d'Ivoire” OR “Ivory Coast” OR Gambia OR Ghana OR Guinea OR Guinea-Bissau OR Liberia OR Mali OR Mauritania OR Niger OR Nigeria OR Senegal OR “Sierra Leone” OR Togo OR Angola OR Cameroon OR “Central African Republic” OR Chad OR Congo OR “Equatorial Guinea” OR Gabon OR “Sao Tome” OR Botswana OR Lesotho OR Namibia OR “South Africa” OR Swaziland)                                                                                                                                                           |
| <b>Google Scholar</b> | SARS OR COVID OR coronavirus OR nCoV) (Prevalence OR Seroprevalence OR Seroepidemiology OR Surveillance OR anti OR Antibody OR antibodies OR IgG OR IgM OR IgA) (Algeria OR Egypt OR Libya OR Morocco OR “South Sudan” OR Sudan OR Tunisia OR Burundi OR Comoros OR Djibouti OR Eritrea OR Ethiopia OR Kenya OR Madagascar OR Malawi OR Mauritius OR Mozambique OR Rwanda OR Seychelles OR Somalia OR Tanzania OR Uganda OR Zambia OR Zimbabwe OR Benin OR “Burkina Faso” OR “Cape Verde” OR “Cote d'Ivoire” OR “Ivory Coast” OR Gambia OR Ghana OR Guinea OR Guinea-Bissau OR Liberia OR Mali OR Mauritania OR Niger OR Nigeria OR Senegal OR “Sierra Leone” OR Togo OR Angola OR Cameroon OR “Central African Republic” OR Chad OR Congo OR “Equatorial Guinea” OR Gabon OR “Sao Tome” OR Botswana OR Lesotho OR Namibia OR “South Africa” OR Swaziland) |

**Table S3:** Quality assessment of the included studies.

| No. | Study ID           | Questions assessing included studies |   |   |   |   |   |   |   |   | Yes (%) |
|-----|--------------------|--------------------------------------|---|---|---|---|---|---|---|---|---------|
|     |                    | 1                                    | 2 | 3 | 4 | 5 | 6 | 7 | 8 | 9 |         |
| 1   | Abdella 2021       | Y                                    | Y | Y | Y | N | Y | Y | N | Y | 77.8    |
| 2   | Abdelmoniem 2021   | Y                                    | Y | Y | Y | Y | Y | Y | Y | Y | 100     |
| 3   | Adetifa 2021       | Y                                    | Y | Y | Y | N | Y | U | Y | Y | 77.8    |
| 4   | Assefa 2021        | Y                                    | Y | Y | Y | N | Y | U | N | Y | 66.7    |
| 5   | Batchi-Bouyou 2021 | Y                                    | U | N | Y | Y | Y | Y | Y | Y | 77.8    |
| 6   | Chibwana 2020      | Y                                    | Y | Y | Y | N | Y | Y | N | U | 66.7    |
| 7   | Etyang 2021        | Y                                    | Y | Y | Y | N | Y | Y | Y | Y | 88.9    |
| 8   | Fai 2021           | U                                    | Y | N | Y | Y | Y | Y | Y | U | 66.7    |
| 9   | Fwoloshi 2021      | Y                                    | Y | U | Y | N | Y | Y | Y | U | 66.7    |
| 10  | George 2021        | Y                                    | Y | Y | N | Y | Y | N | N | Y | 66.7    |
| 11  | Goldblatt 2021     | Y                                    | Y | U | N | N | Y | Y | Y | U | 55.6    |
| 12  | Halatoko 2020      | Y                                    | Y | Y | Y | Y | Y | Y | Y | Y | 100     |
| 13  | Kagucia 2021       | Y                                    | Y | U | Y | N | Y | Y | Y | U | 66.7    |
| 14  | Kammon 2020        | Y                                    | U | N | Y | Y | Y | N | N | U | 44.5    |
| 15  | Kassem 2020        | Y                                    | U | Y | Y | Y | Y | Y | Y | Y | 88.9    |
| 16  | Katchunga 2021     | Y                                    | U | N | Y | Y | Y | Y | Y | U | 66.7    |
| 17  | Kempen 2020        | Y                                    | N | N | N | N | Y | Y | Y | U | 44.5    |
| 18  | Milleliri 2021     | Y                                    | U | Y | Y | N | Y | Y | Y | U | 66.7    |
| 19  | Mostafa 2021       | Y                                    | U | Y | N | Y | Y | Y | Y | U | 66.7    |
| 20  | Mukhtar 2021       | Y                                    | Y | Y | Y | N | Y | Y | Y | Y | 88.9    |
| 21  | Mukwege 2021       | Y                                    | Y | Y | Y | N | Y | Y | Y | Y | 88.9    |
| 22  | Mulenga 2021       | Y                                    | Y | Y | Y | N | Y | Y | Y | Y | 88.9    |
| 23  | Nega 2020          | Y                                    | U | N | Y | N | Y | Y | N | N | 44.5    |
| 24  | Ngere 2021         | Y                                    | Y | Y | Y | N | Y | Y | N | Y | 77.8    |
| 25  | Nkuba 2021         | Y                                    | Y | Y | Y | N | Y | Y | Y | Y | 88.9    |
| 26  | Nwosu 2021         | Y                                    | Y | Y | Y | Y | Y | Y | Y | Y | 100     |
| 27  | Olayanju 2021      | Y                                    | U | N | N | N | Y | Y | Y | U | 44.5    |
| 28  | Quashie 2021       | Y                                    | U | U | N | N | Y | Y | Y | U | 44.5    |
| 29  | Rusakaniko 2021    | Y                                    | Y | N | Y | Y | Y | Y | Y | U | 77.8    |
| 30  | Sebastião 2021     | Y                                    | N | Y | Y | Y | Y | Y | Y | U | 77.8    |
| 31  | Shaw 2021          | Y                                    | U | N | Y | N | Y | Y | Y | U | 55.6    |
| 32  | Shaweno 2021       | Y                                    | Y | N | Y | N | Y | Y | Y | U | 66.7    |
| 33  | Uyoga 2021         | Y                                    | U | Y | Y | N | Y | Y | Y | Y | 77.8    |
| 34  | Wiens 2021         | Y                                    | Y | Y | Y | N | Y | Y | Y | Y | 88.9    |
| 35  | Zarmouh 2021       | Y                                    | Y | Y | Y | Y | Y | Y | Y | Y | 100     |

1. Was the sample frame appropriate to address the target population? 2. Were study participants sampled in an appropriate way? 3. Was the sample size adequate? 4. Were the study subjects and the setting described in detail? 5. Was the data analysis conducted with sufficient coverage of the identified sample? 6. Were valid methods used for the identification of the condition? 7. Was the condition measured in a standard, reliable way for all participants? 8. Was there appropriate statistical analysis? 9. Was the response rate adequate, and if not, was the low response rate managed appropriately? Y=Yes; N=No; U=Unclear or NA Not applicable

A

Study ID

Overall IgG

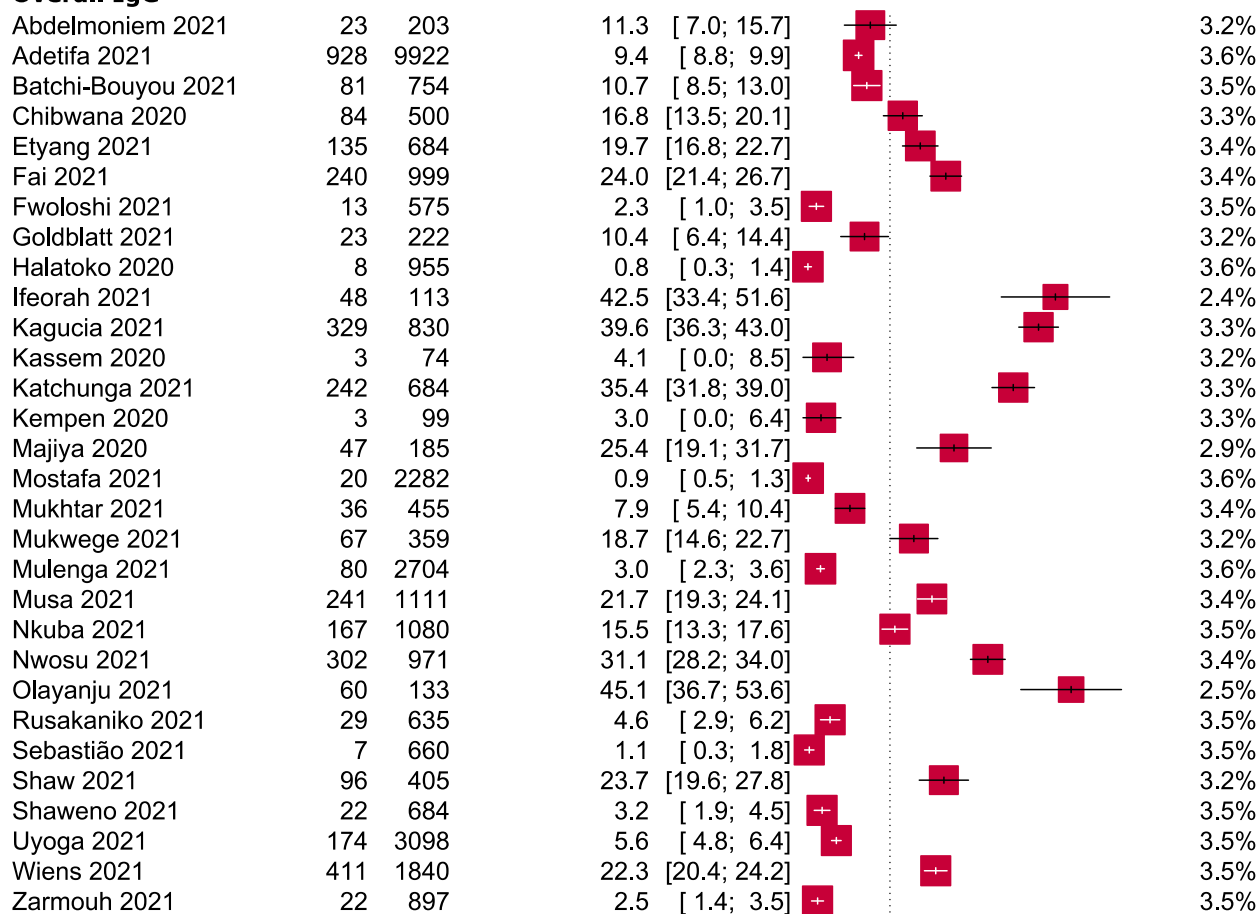

Random effects model

34113

14.6 [12.2; 17.1]

100.0%

Heterogeneity:  $I^2 = 99\%$ ,  $\tau^2 = 0.0043$ ,  $\chi^2_{29} = 3321.89$  ( $p = 0$ )

0 10 20 30 40 50 60  
Seroprevalence (%)

**B**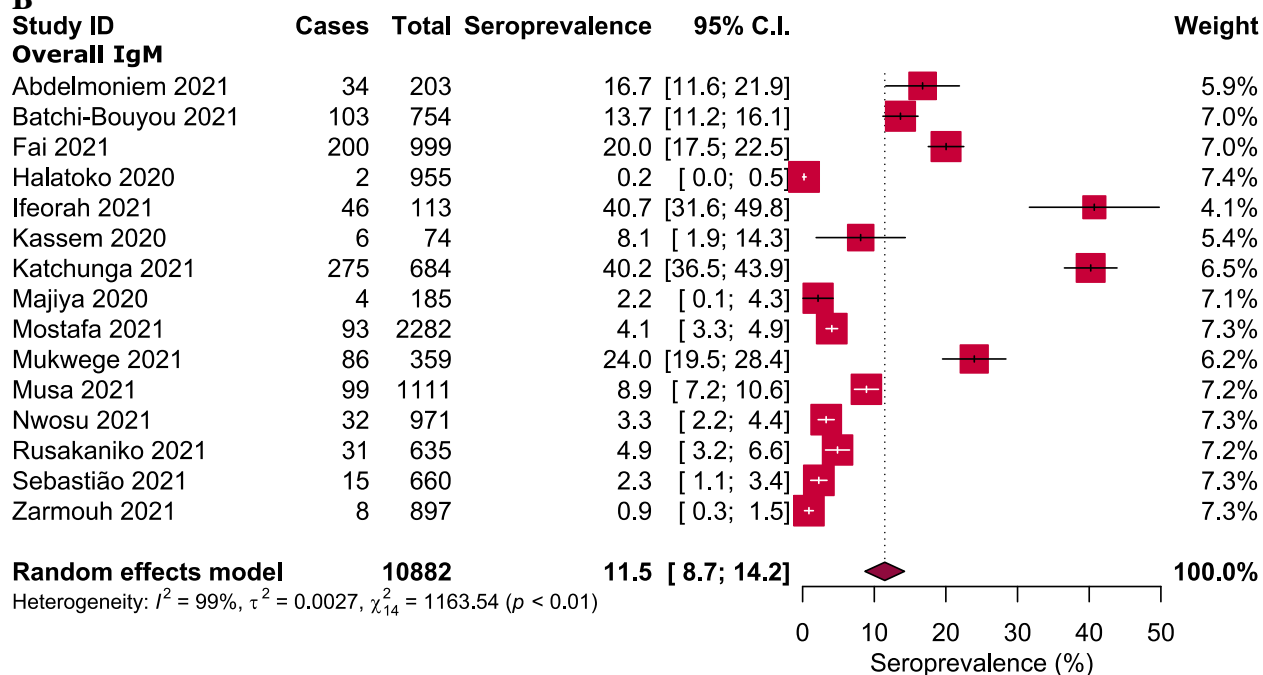**C**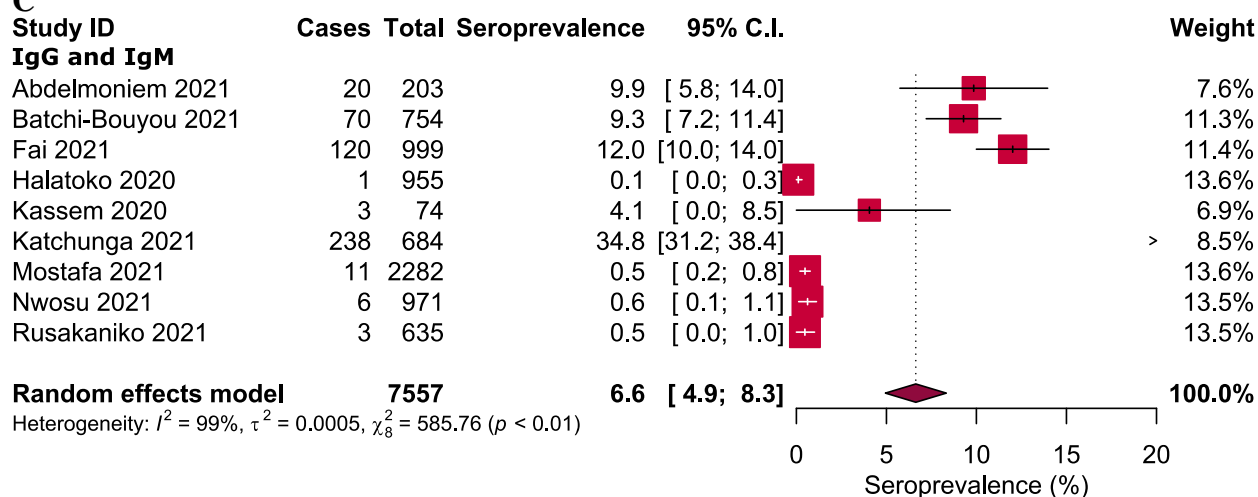

**D**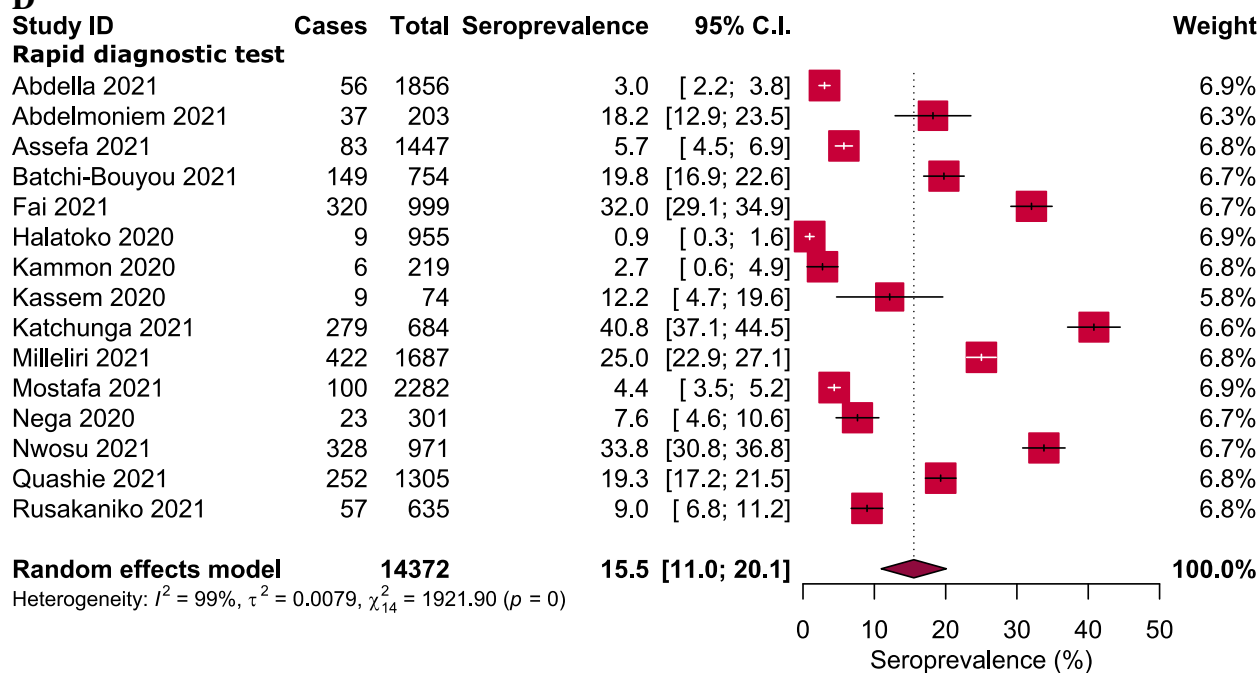**E**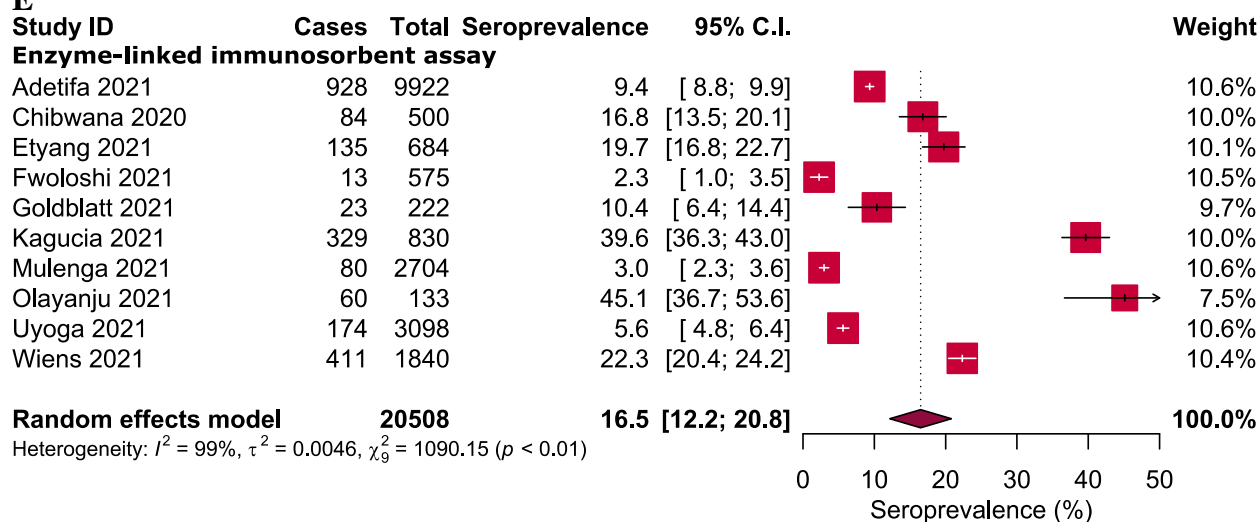**F**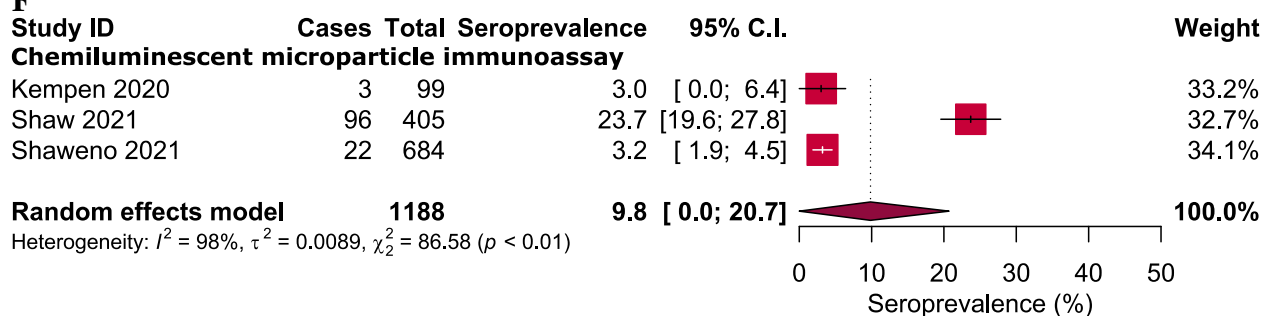



**G**

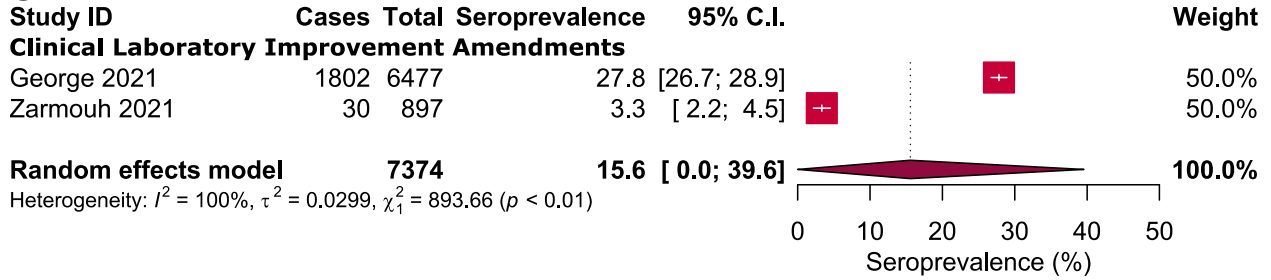

**H**

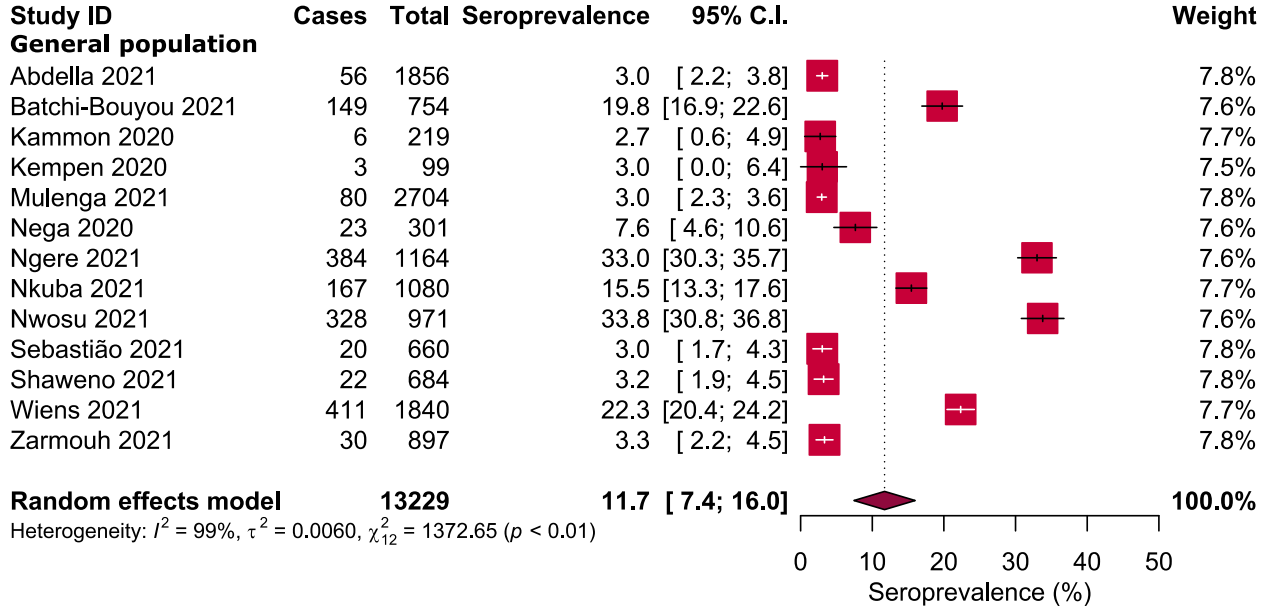

**I**

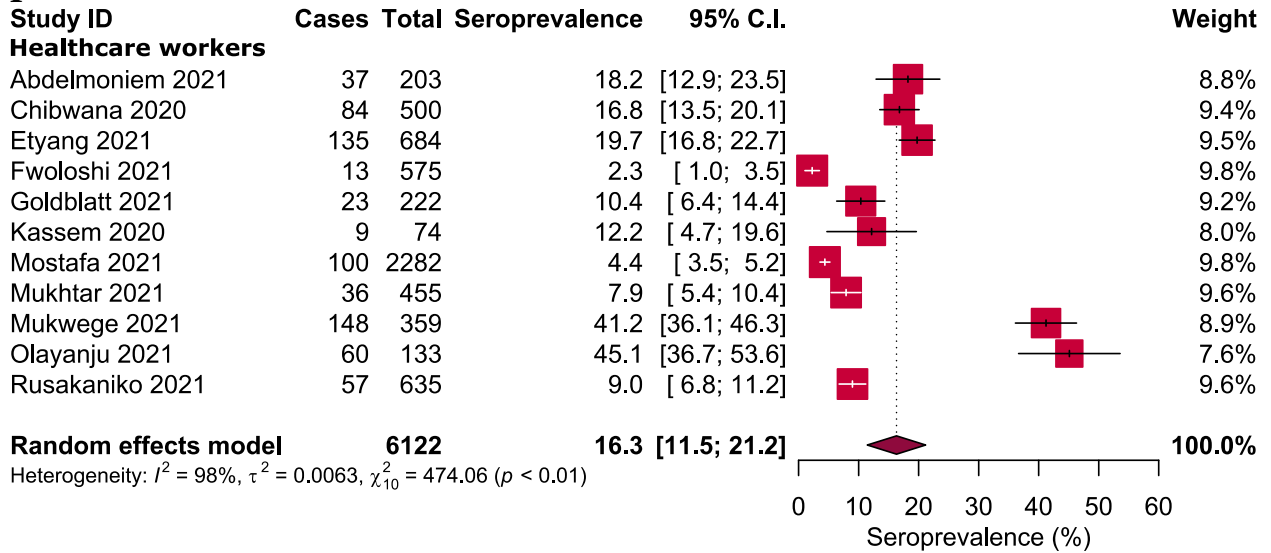

**J**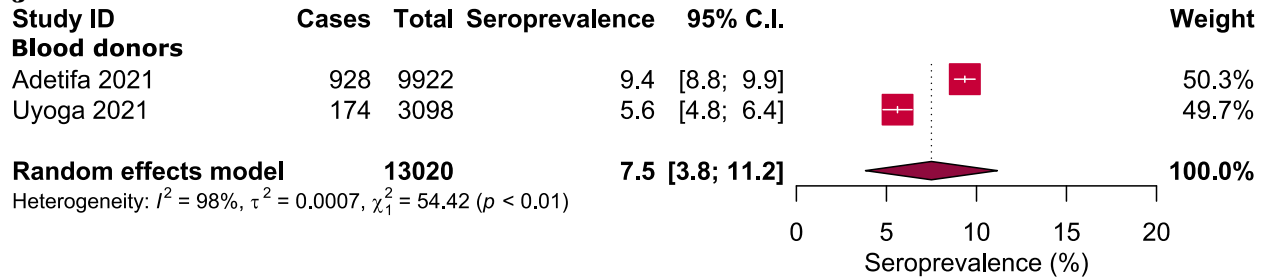**K**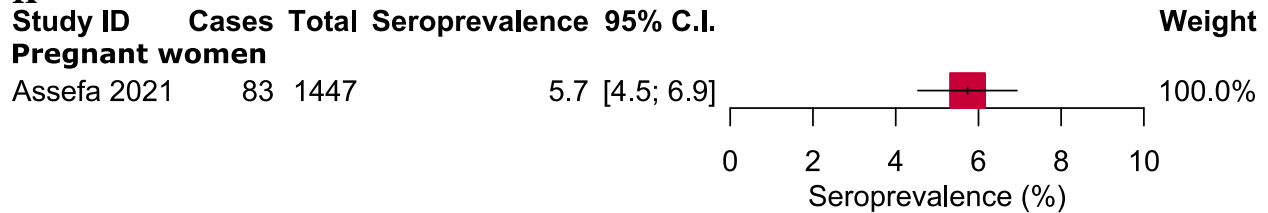**L**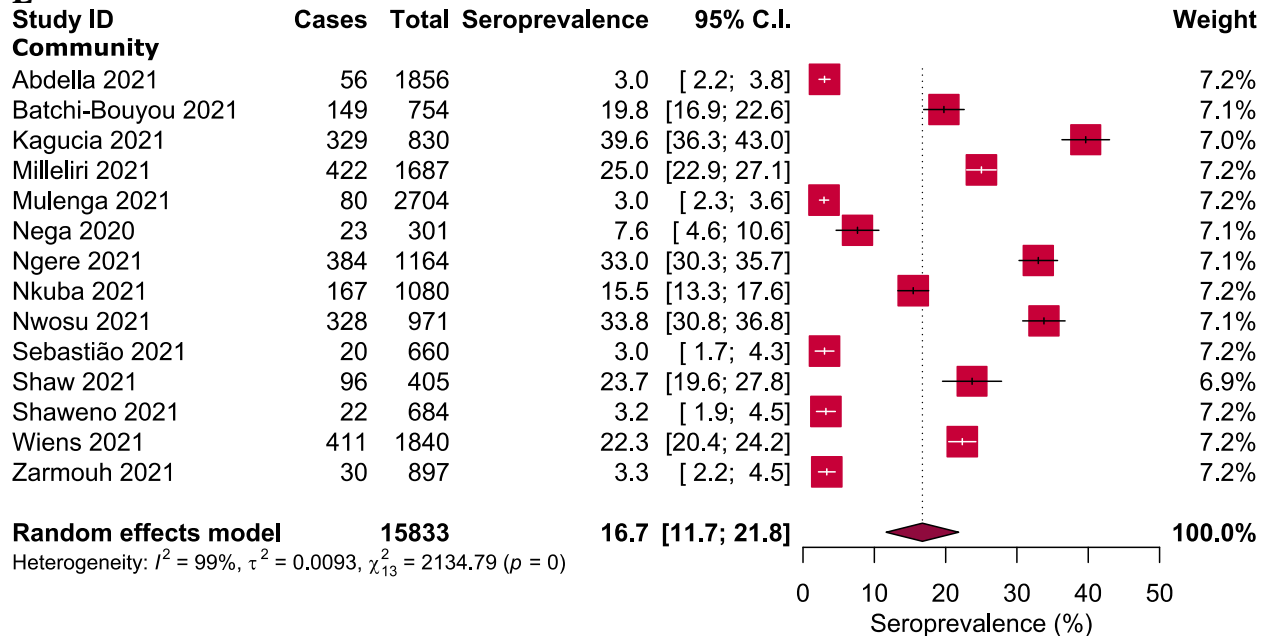

## M

| Study ID<br>Hospital | Cases | Total | Seroprevalence | 95% C.I.     | Weight |
|----------------------|-------|-------|----------------|--------------|--------|
| Abdelmoniem 2021     | 37    | 203   | 18.2           | [12.9; 23.5] | 11.0%  |
| Chibwana 2020        | 84    | 500   | 16.8           | [13.5; 20.1] | 11.4%  |
| Etyang 2021          | 135   | 684   | 19.7           | [16.8; 22.7] | 11.5%  |
| George 2021          | 1802  | 6477  | 27.8           | [26.7; 28.9] | 11.7%  |
| Goldblatt 2021       | 23    | 222   | 10.4           | [ 6.4; 14.4] | 11.3%  |
| Kassem 2020          | 9     | 74    | 12.2           | [ 4.7; 19.6] | 10.4%  |
| Mukhtar 2021         | 36    | 455   | 7.9            | [ 5.4; 10.4] | 11.6%  |
| Mukwege 2021         | 148   | 359   | 41.2           | [36.1; 46.3] | 11.1%  |
| Olayanju 2021        | 60    | 133   | 45.1           | [36.7; 53.6] | 10.0%  |

**Random effects model** **9107** **21.9 [14.8; 29.0]** **100.0%**

Heterogeneity:  $I^2 = 98\%$ ,  $\tau^2 = 0.0111$ ,  $\chi^2_8 = 359.67$  ( $p < 0.01$ )

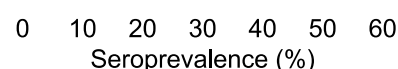

## N

| Study ID<br>Healthcare facilities | Cases | Total | Seroprevalence | 95% C.I.     | Weight |
|-----------------------------------|-------|-------|----------------|--------------|--------|
| Assefa 2021                       | 83    | 1447  | 5.7            | [ 4.5; 6.9]  | 17.0%  |
| Fwoloshi 2021                     | 13    | 575   | 2.3            | [ 1.0; 3.5]  | 17.0%  |
| Katchunga 2021                    | 279   | 684   | 40.8           | [37.1; 44.5] | 16.0%  |
| Kempen 2020                       | 3     | 99    | 3.0            | [ 0.0; 6.4]  | 16.1%  |
| Mostafa 2021                      | 100   | 2282  | 4.4            | [ 3.5; 5.2]  | 17.1%  |
| Rusakaniko 2021                   | 57    | 635   | 9.0            | [ 6.8; 11.2] | 16.7%  |

**Random effects model** **5722** **10.6 [ 5.1; 16.1]** **100.0%**

Heterogeneity:  $I^2 = 99\%$ ,  $\tau^2 = 0.0046$ ,  $\chi^2_5 = 398.06$  ( $p < 0.01$ )

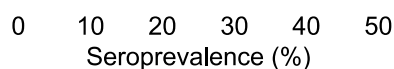

## O

| Study ID<br>Blood transfusion centre | Cases | Total | Seroprevalence | 95% C.I.   | Weight |
|--------------------------------------|-------|-------|----------------|------------|--------|
| Adetifa 2021                         | 928   | 9922  | 9.4            | [8.8; 9.9] | 50.3%  |
| Uyoga 2021                           | 174   | 3098  | 5.6            | [4.8; 6.4] | 49.7%  |

**Random effects model** **13020** **7.5 [3.8; 11.2]** **100.0%**

Heterogeneity:  $I^2 = 98\%$ ,  $\tau^2 = 0.0007$ ,  $\chi^2_1 = 54.42$  ( $p < 0.01$ )

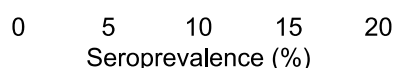

## P

| Study ID<br>Northern Africa | Cases | Total | Seroprevalence | 95% C.I.     | Weight |
|-----------------------------|-------|-------|----------------|--------------|--------|
| Abdelmoniem 2021            | 37    | 203   | 18.2           | [12.9; 23.5] | 10.8%  |
| Kammon 2020                 | 6     | 219   | 2.7            | [ 0.6; 4.9]  | 19.4%  |
| Kassem 2020                 | 9     | 74    | 12.2           | [ 4.7; 19.6] | 7.1%   |
| Mostafa 2021                | 100   | 2282  | 4.4            | [ 3.5; 5.2]  | 22.4%  |
| Mukhtar 2021                | 36    | 455   | 7.9            | [ 5.4; 10.4] | 18.5%  |
| Zarmouh 2021                | 30    | 897   | 3.3            | [ 2.2; 4.5]  | 21.9%  |

**Random effects model** **4130** **6.5 [ 4.1; 8.9]** **100.0%**

Heterogeneity:  $I^2 = 88\%$ ,  $\tau^2 = 0.0006$ ,  $\chi^2_5 = 43.27$  ( $p < 0.01$ )

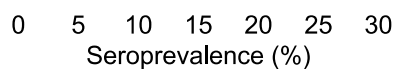

## Q

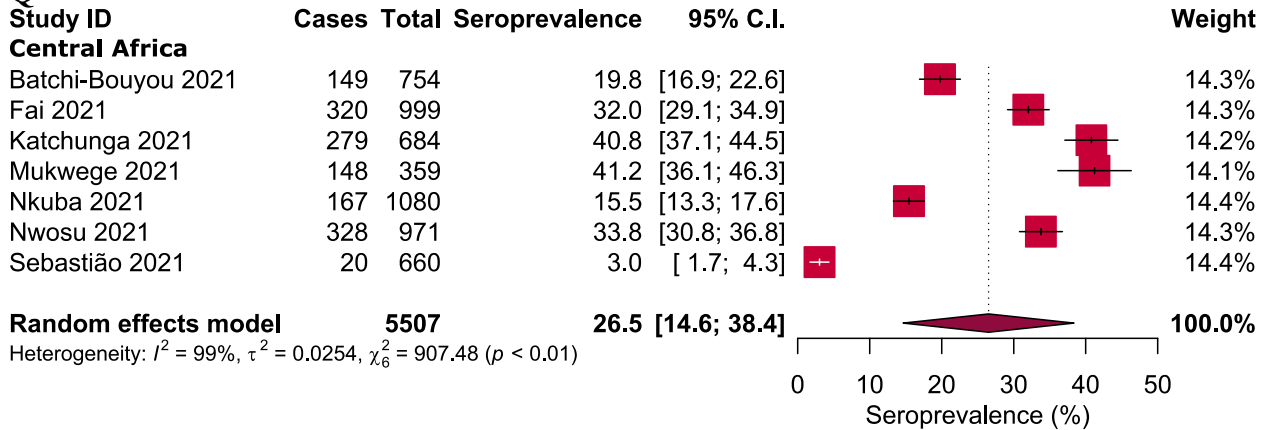

## R

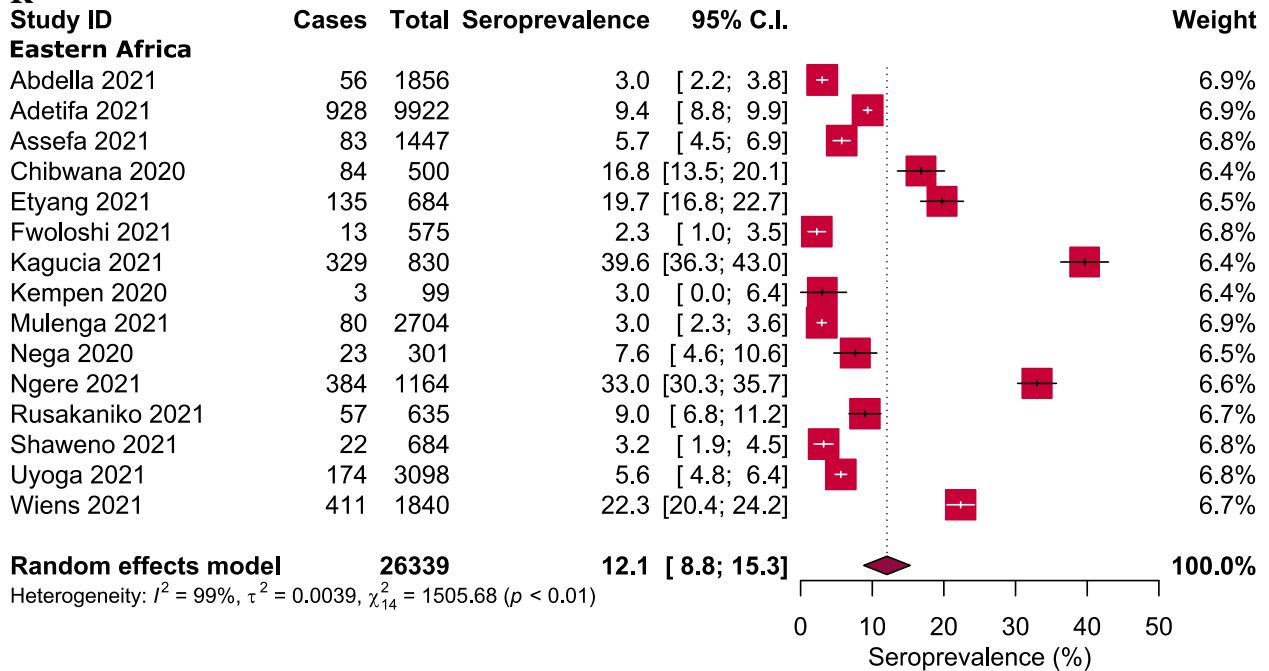

## S

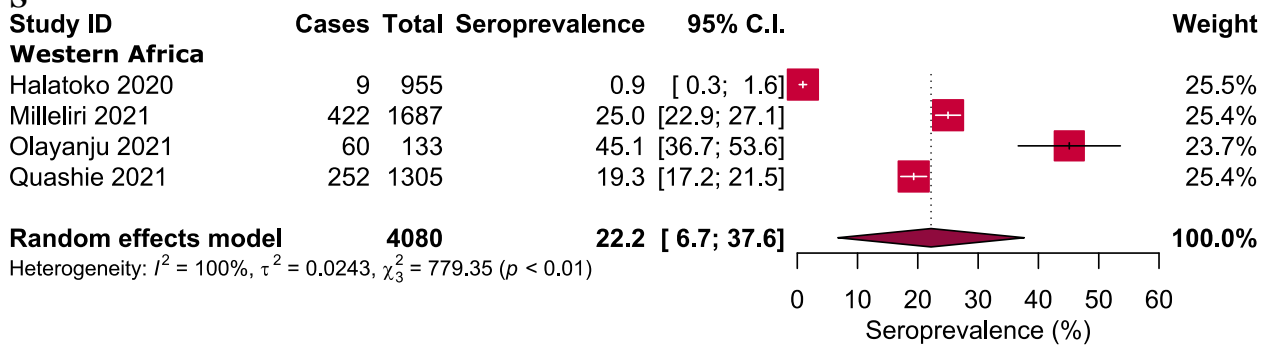

**T**

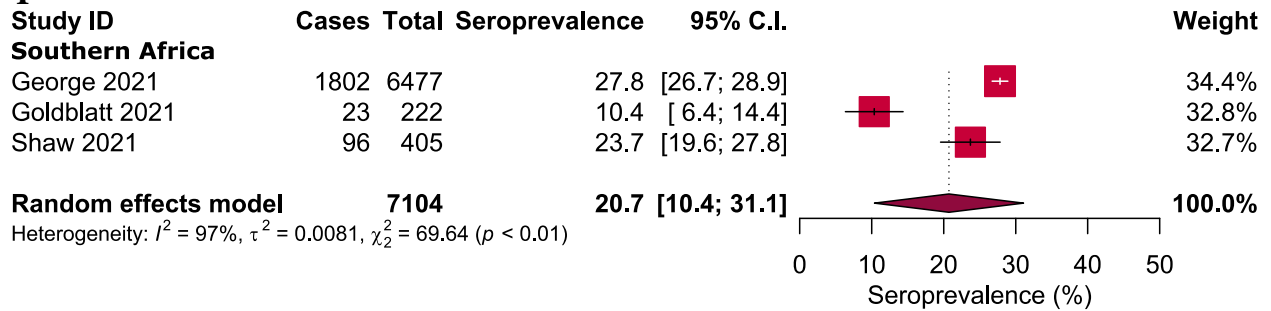

**U**

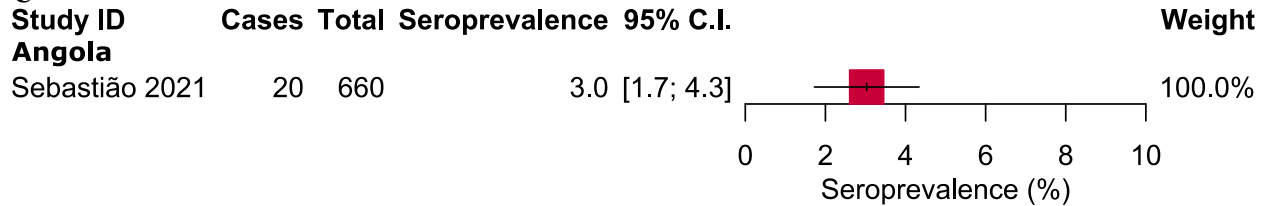

**V**

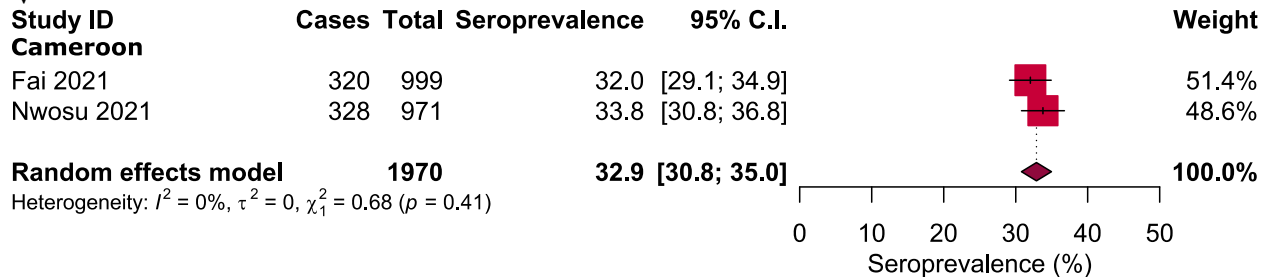

**W**

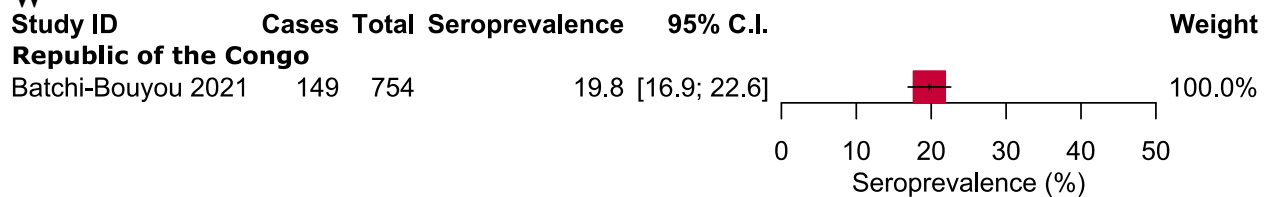

**X**

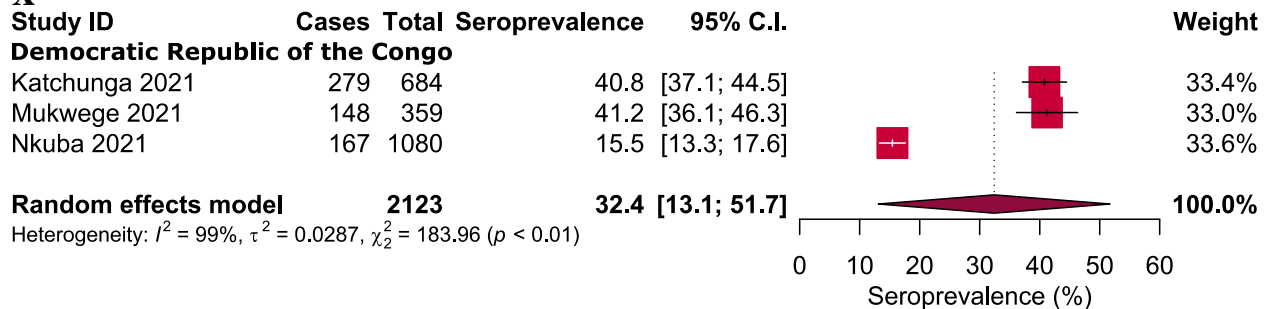

**Y**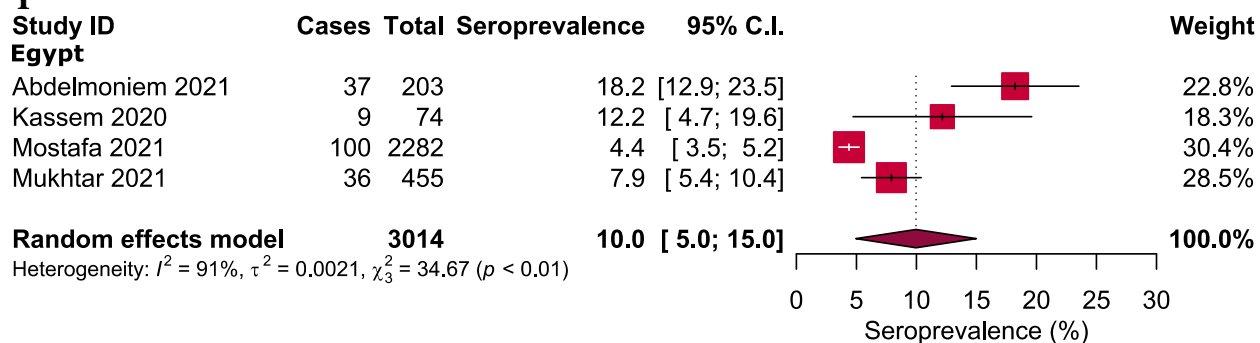**Z**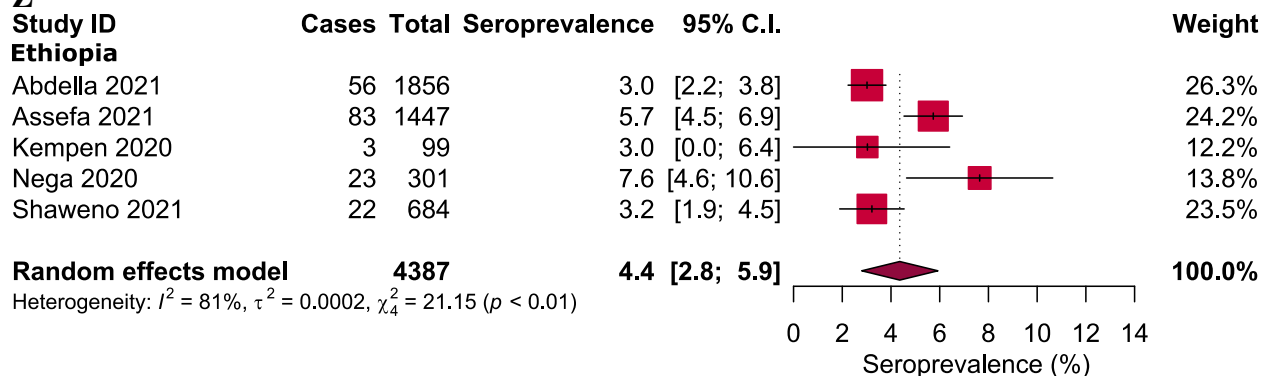**AA**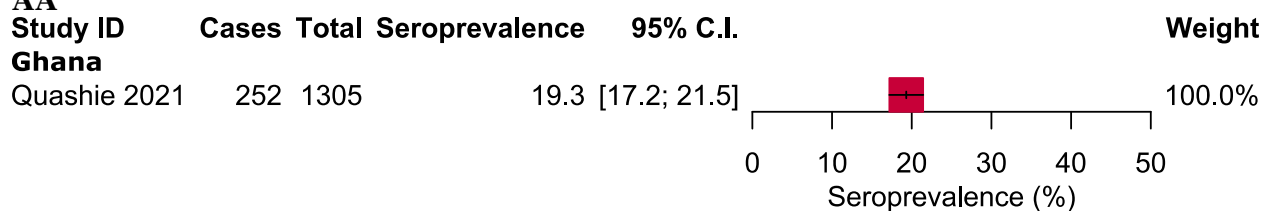**AB**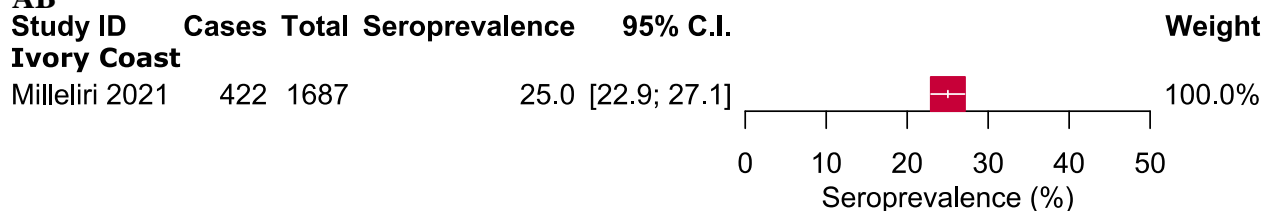**AC**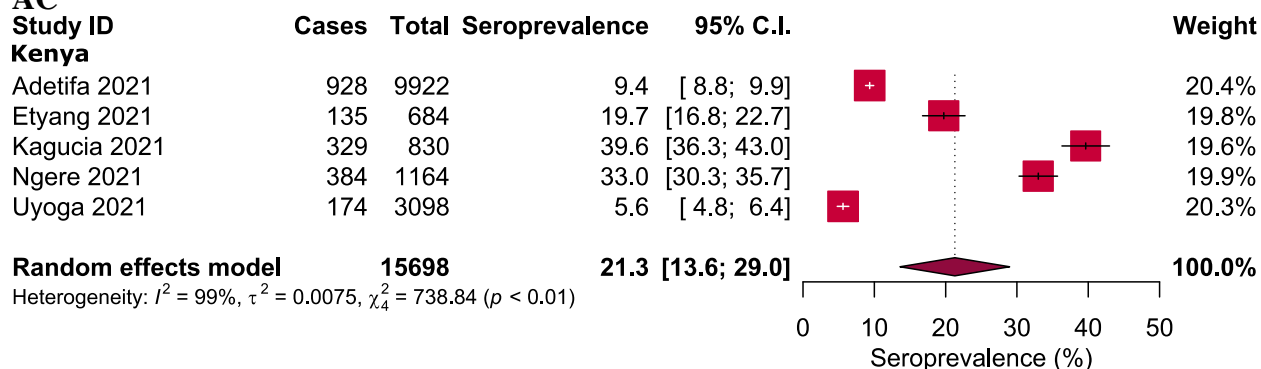

**AD**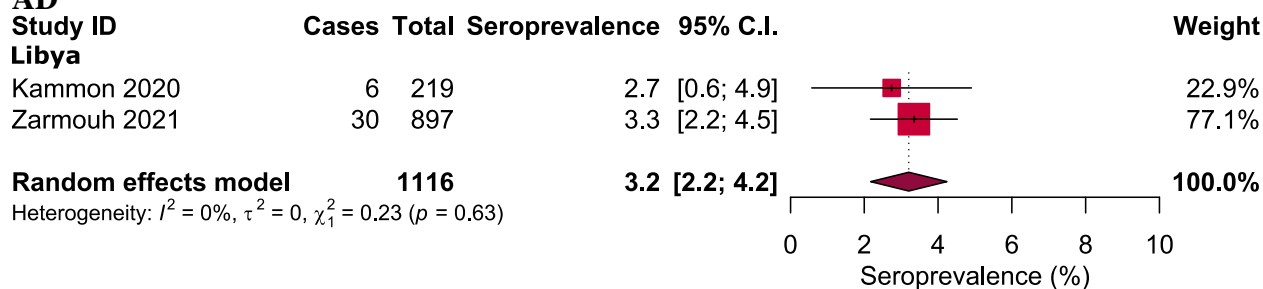**AE**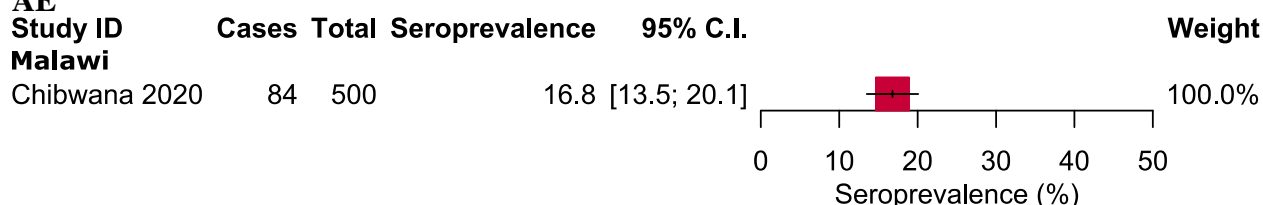**AF**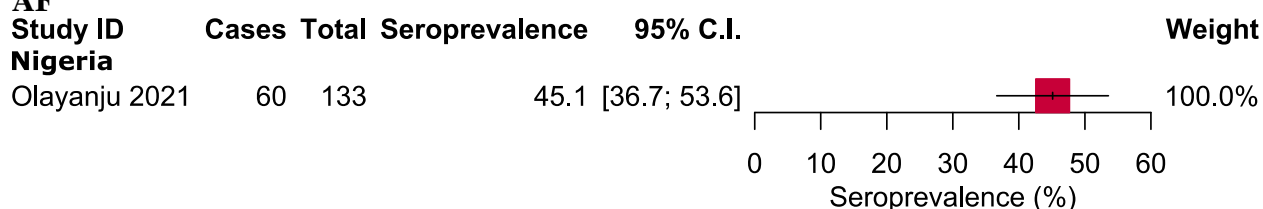**AG**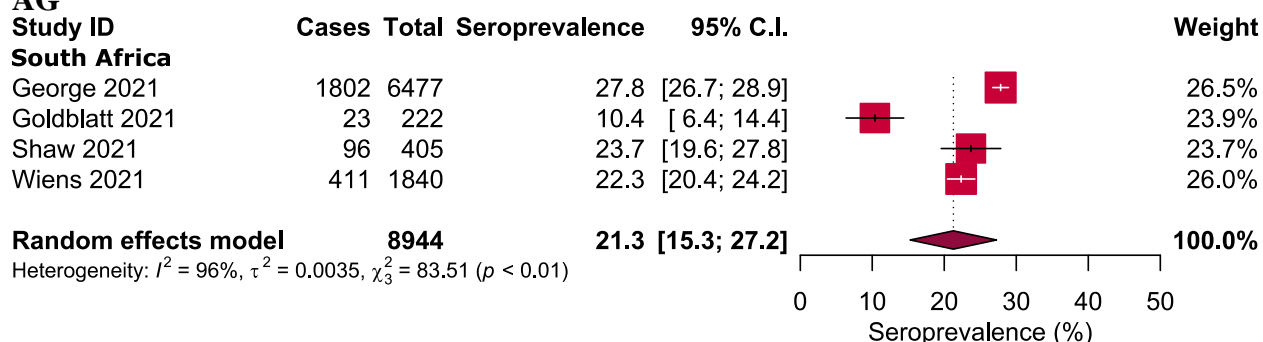**AH**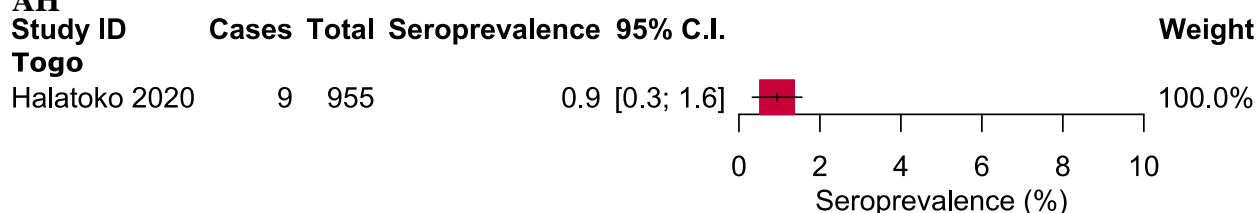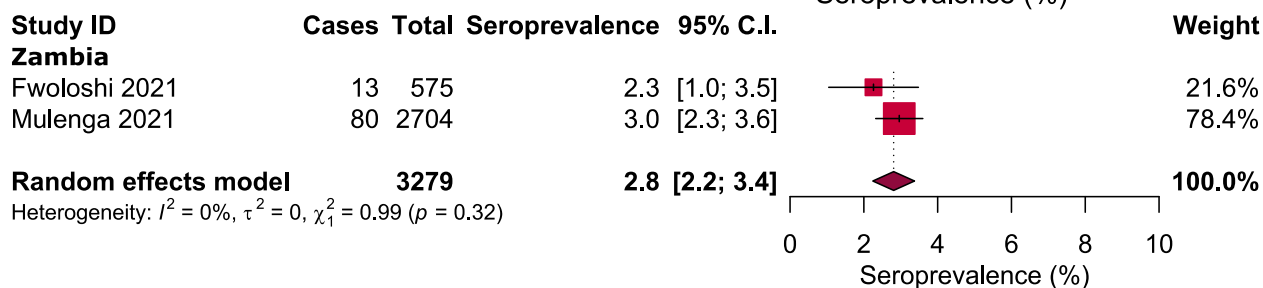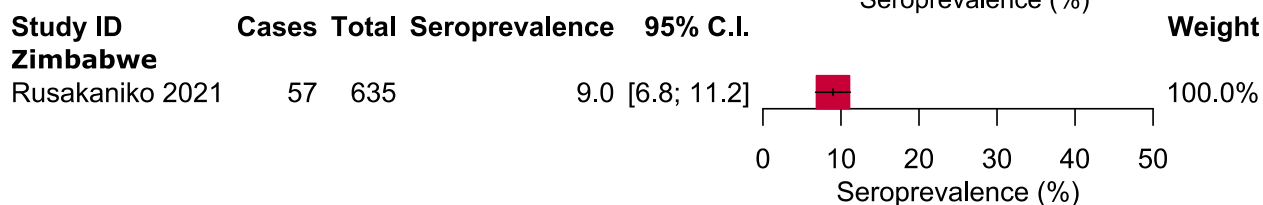

**Figure S1.** Subgroup analyses representing the seroprevalence of SARS-CoV-2 antibodies in Africa based on antibody isotypes (A-C), antibody tests (D-G), target population (H-K), settings (L-O), regions (P-T) and countries (U-AJ).



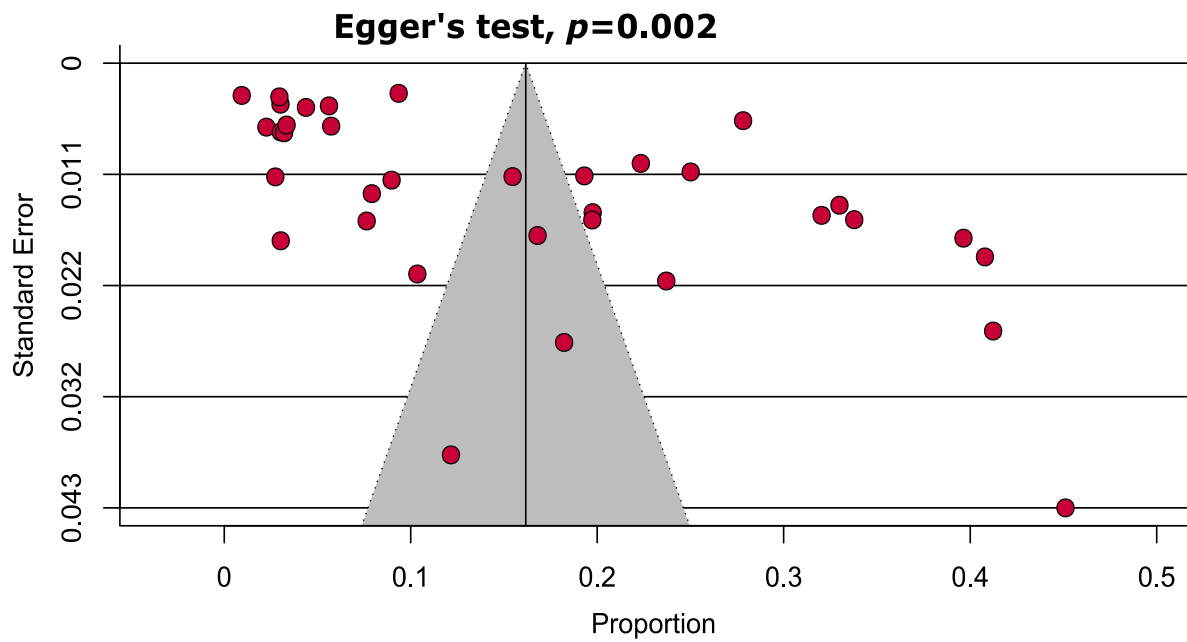

**Figure S2.** Funnel plot on overall seroprevalence of SARS-CoV-2 antibodies in Africa identified significant publication bias.

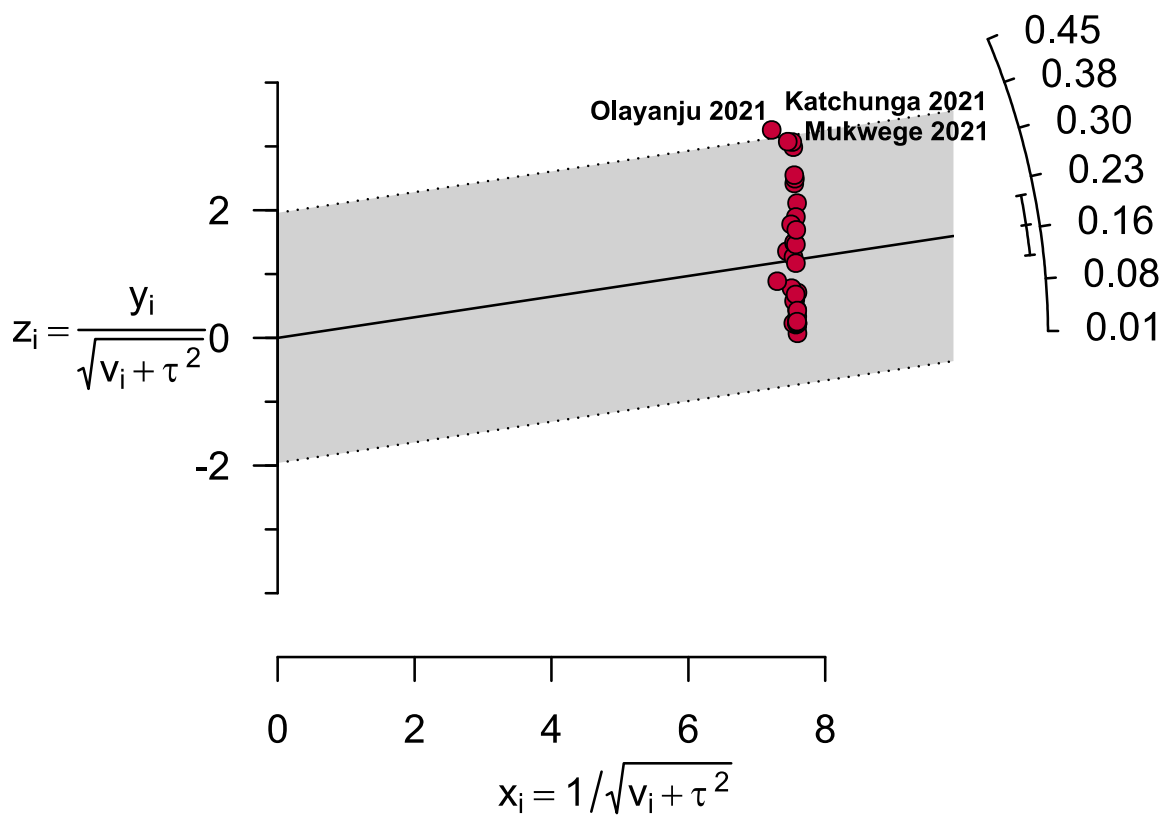

**Figure S3.** Galbraith plot on overall seroprevalence of SARS-CoV-2 antibodies in Africa identified three outlier studies.

A

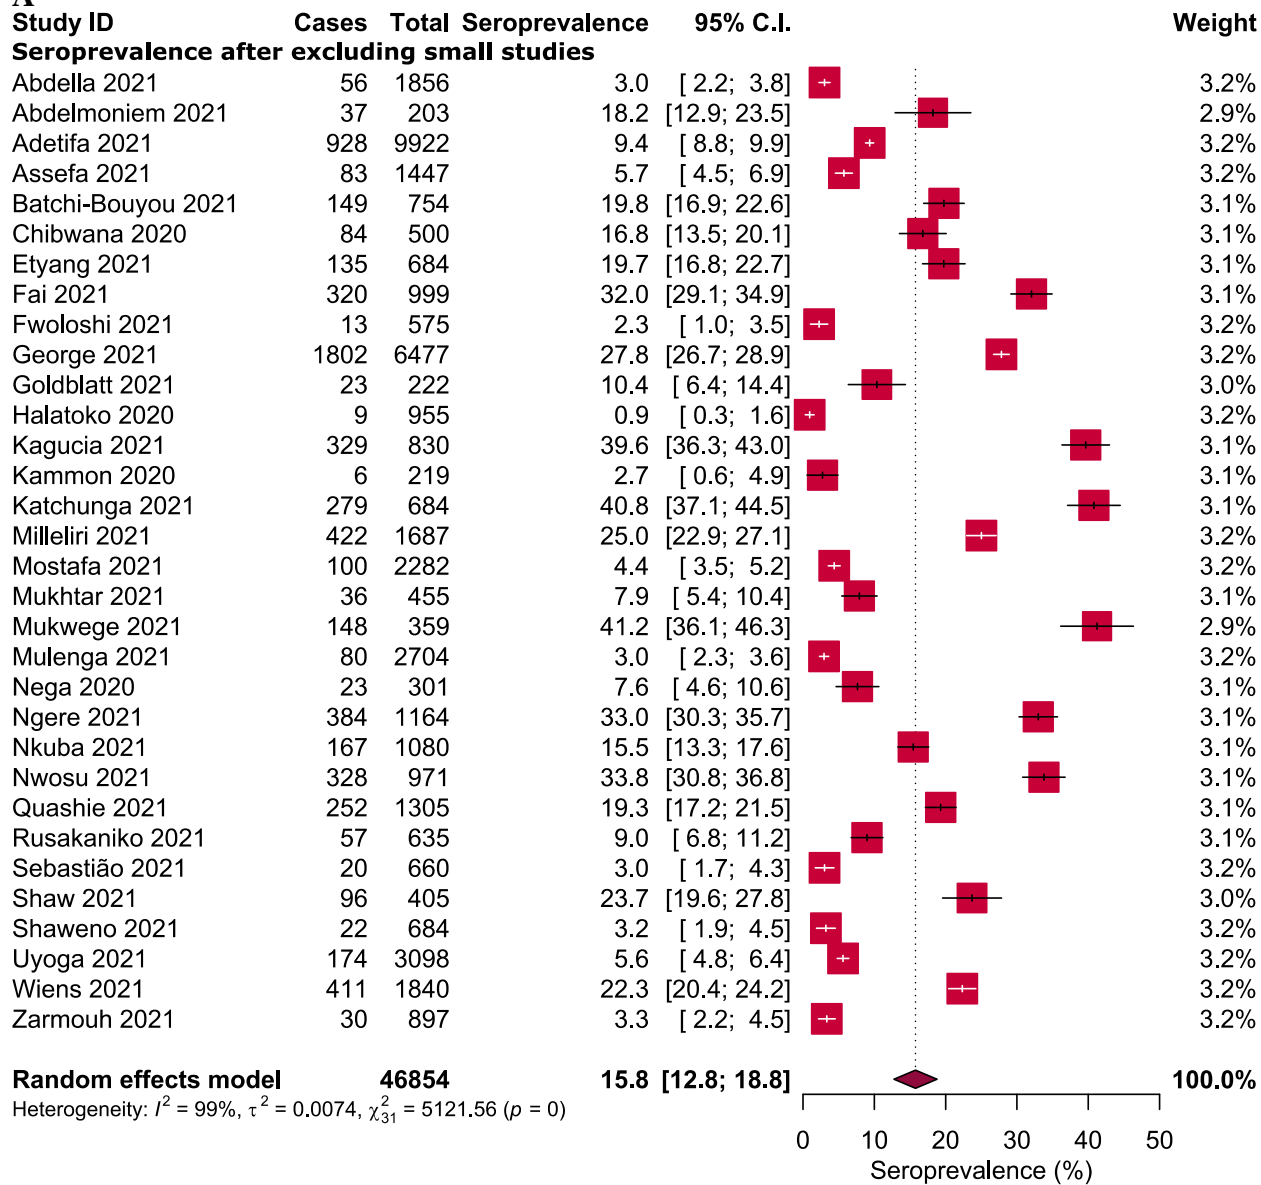

**B**

| Study ID                                                  | Cases | Total | Seroprevalence | 95% C.I.     | Weight |
|-----------------------------------------------------------|-------|-------|----------------|--------------|--------|
| <b>Seroprevalence after excluding low-quality studies</b> |       |       |                |              |        |
| Abdella 2021                                              | 56    | 1856  | 3.0            | [ 2.2; 3.8]  | 3.4%   |
| Abdelmoniem 2021                                          | 37    | 203   | 18.2           | [12.9; 23.5] | 3.1%   |
| Adetifa 2021                                              | 928   | 9922  | 9.4            | [ 8.8; 9.9]  | 3.4%   |
| Assefa 2021                                               | 83    | 1447  | 5.7            | [ 4.5; 6.9]  | 3.4%   |
| Batchi-Bouyou 2021                                        | 149   | 754   | 19.8           | [16.9; 22.6] | 3.3%   |
| Chibwana 2020                                             | 84    | 500   | 16.8           | [13.5; 20.1] | 3.3%   |
| Etyang 2021                                               | 135   | 684   | 19.7           | [16.8; 22.7] | 3.3%   |
| Fai 2021                                                  | 320   | 999   | 32.0           | [29.1; 34.9] | 3.3%   |
| Fwoloshi 2021                                             | 13    | 575   | 2.3            | [ 1.0; 3.5]  | 3.4%   |
| George 2021                                               | 1802  | 6477  | 27.8           | [26.7; 28.9] | 3.4%   |
| Goldblatt 2021                                            | 23    | 222   | 10.4           | [ 6.4; 14.4] | 3.2%   |
| Halatoko 2020                                             | 9     | 955   | 0.9            | [ 0.3; 1.6]  | 3.4%   |
| Kagucia 2021                                              | 329   | 830   | 39.6           | [36.3; 43.0] | 3.3%   |
| Kassem 2020                                               | 9     | 74    | 12.2           | [ 4.7; 19.6] | 2.9%   |
| Katchunga 2021                                            | 279   | 684   | 40.8           | [37.1; 44.5] | 3.3%   |
| Milleliri 2021                                            | 422   | 1687  | 25.0           | [22.9; 27.1] | 3.4%   |
| Mostafa 2021                                              | 100   | 2282  | 4.4            | [ 3.5; 5.2]  | 3.4%   |
| Mukhtar 2021                                              | 36    | 455   | 7.9            | [ 5.4; 10.4] | 3.4%   |
| Mukwege 2021                                              | 148   | 359   | 41.2           | [36.1; 46.3] | 3.1%   |
| Mulenga 2021                                              | 80    | 2704  | 3.0            | [ 2.3; 3.6]  | 3.4%   |
| Ngere 2021                                                | 384   | 1164  | 33.0           | [30.3; 35.7] | 3.3%   |
| Nkuba 2021                                                | 167   | 1080  | 15.5           | [13.3; 17.6] | 3.4%   |
| Nwosu 2021                                                | 328   | 971   | 33.8           | [30.8; 36.8] | 3.3%   |
| Rusakaniko 2021                                           | 57    | 635   | 9.0            | [ 6.8; 11.2] | 3.4%   |
| Sebastião 2021                                            | 20    | 660   | 3.0            | [ 1.7; 4.3]  | 3.4%   |
| Shaw 2021                                                 | 96    | 405   | 23.7           | [19.6; 27.8] | 3.2%   |
| Shaweno 2021                                              | 22    | 684   | 3.2            | [ 1.9; 4.5]  | 3.4%   |
| Uyoga 2021                                                | 174   | 3098  | 5.6            | [ 4.8; 6.4]  | 3.4%   |
| Wiens 2021                                                | 411   | 1840  | 22.3           | [20.4; 24.2] | 3.4%   |
| Zarmouh 2021                                              | 30    | 897   | 3.3            | [ 2.2; 4.5]  | 3.4%   |

**Random effects model**      **45103**      **16.3 [13.1; 19.4]**      **100.0%**

Heterogeneity:  $I^2 = 99\%$ ,  $\tau^2 = 0.0075$ ,  $\chi^2_{29} = 4987.01$  ( $p = 0$ )

0    10    20    30    40    50  
Seroprevalence (%)

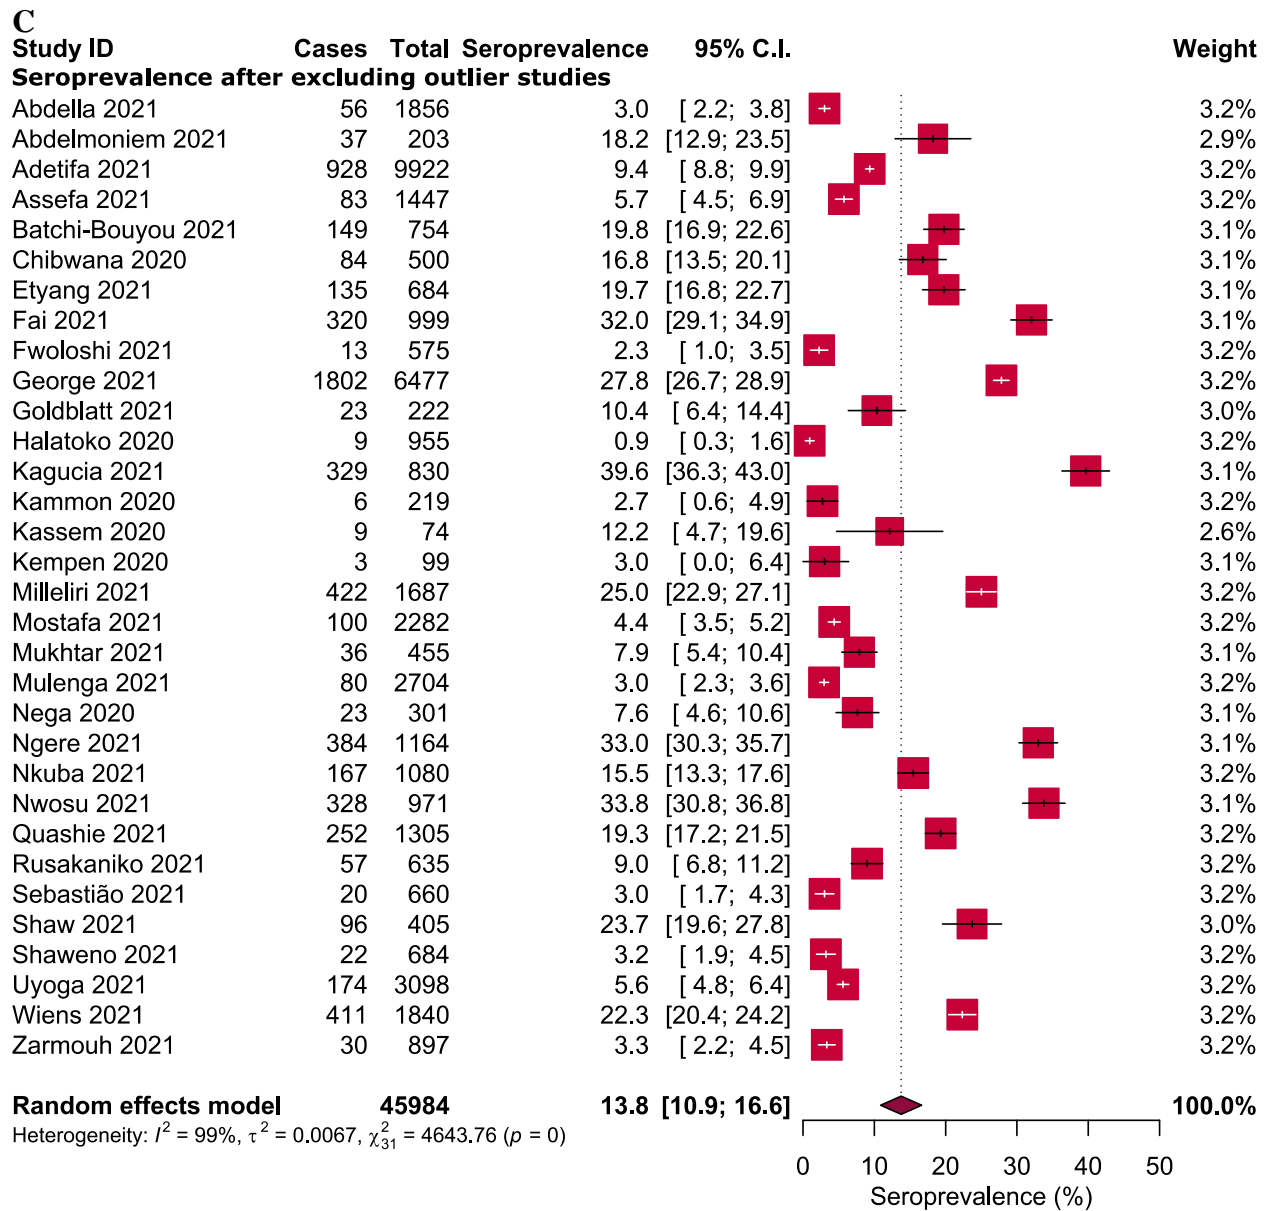

**Figure S4.** Sensitivity analyses by (A) excluding small studies (<200), (B) excluding low-quality studies and (C) excluding outlier studies.
